# Supplementary material for: Synthesis and characterization of Fe3O4@TSC nanocomposite: highly efficient removal of toxic metal ions from aqueous medium
Source: Royal Society of Chemistry journal article supplement (doi:10.1039/c5ra27525c), 2016-01-01
Supplement: c5ra27525c1.pdf [file c5ra27525c1.pdf]

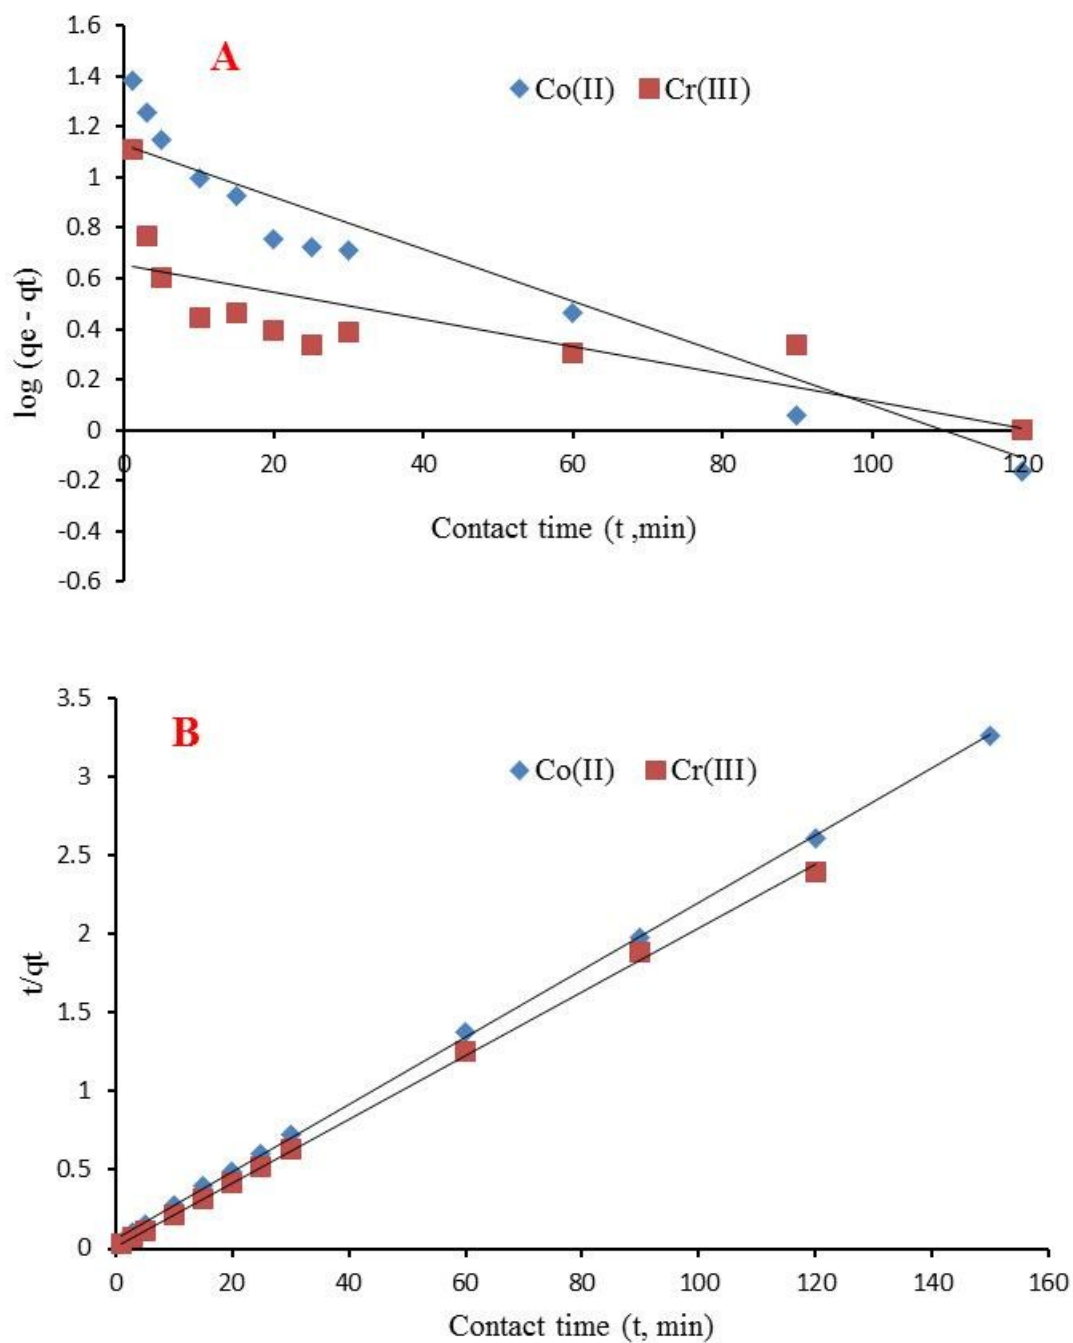

Figure S1. Plots of kinetic models for the adsorption of Cr<sup>3+</sup> and Co<sup>2+</sup> metal ions onto Fe<sub>3</sub>O<sub>4</sub>@TSC nanocomposite (a) Pseudo-first-order, (b) Pseudo-second-order and (c) Intra-particle diffusion models

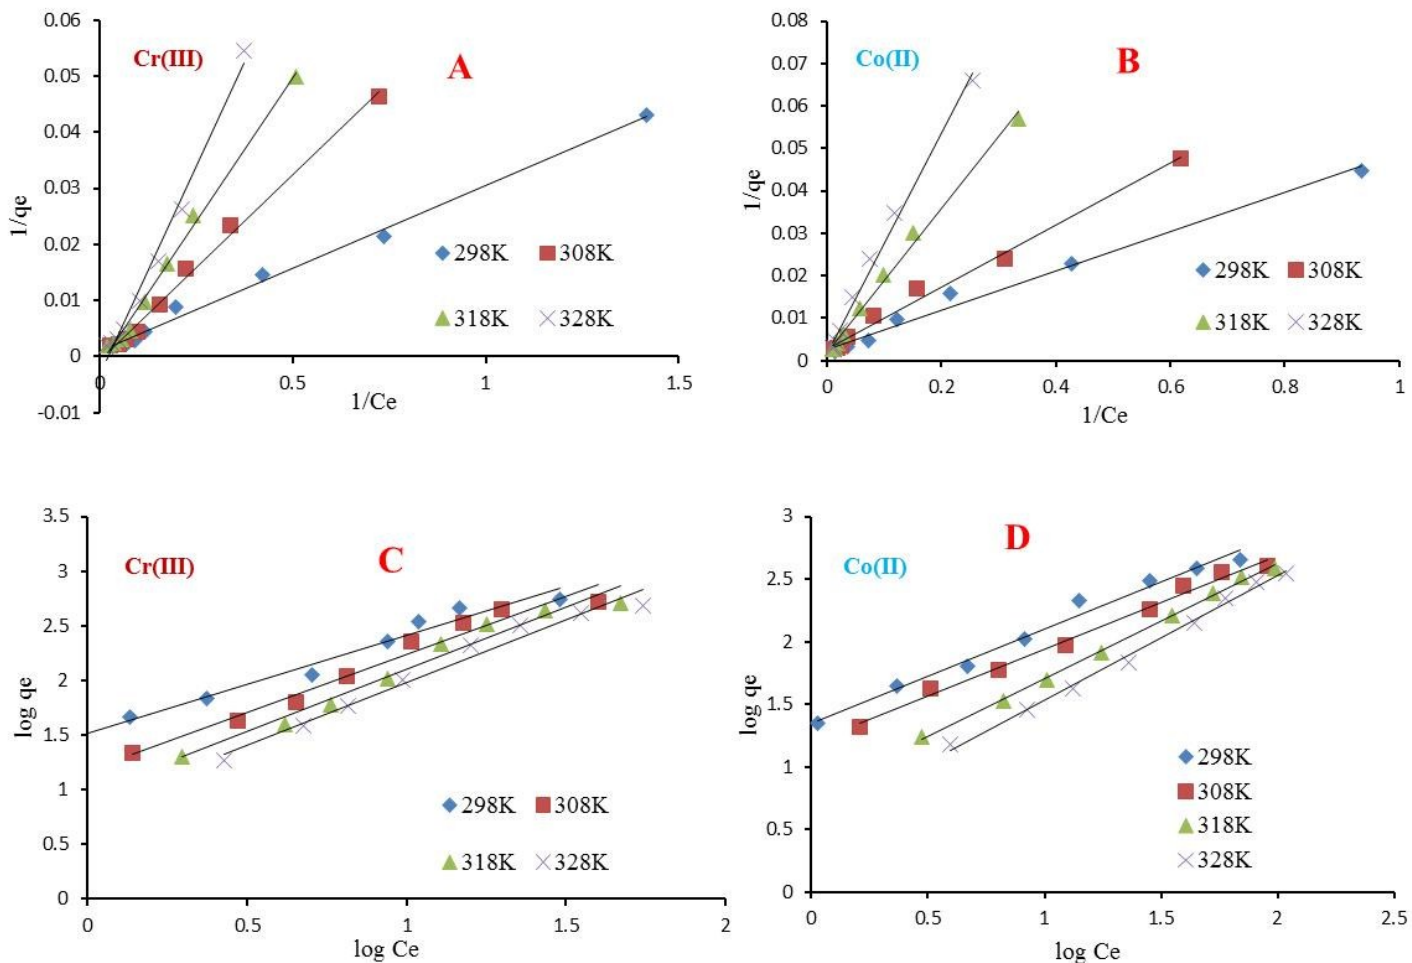

Figure S2. Plots of isotherm models for the adsorption of Cr<sup>3+</sup> and Co<sup>2+</sup> metal ions onto Fe<sub>3</sub>O<sub>4</sub>@TSC nanocomposite (A & B) Langmuir and (C&D) Freundlich isotherm models
